# Supplementary material for: Human C4orf14 interacts with the mitochondrial nucleoid and is involved in the biogenesis of the small mitochondrial ribosomal subunit
Source: PubMed Central journal article supplement — Nucleic Acids Res. 2012 Mar 24;40(13):6097–108. doi: 10.1093/nar/gks257 (PMC3401442; doi:10.1093/nar/gks257), 2012-03-24
Supplement: supp_gks257_Supplementary_Data.pdf [file supp_gks257_Supplementary_Data.pdf]

## SUPPLEMENTARY INFORMATION

**Figure S1. Recombinant tagged C4orf14 co-fractionates with the mitochondrial 28S subunit.** Proteins derived from sucrose gradient fractions equivalent to those shown in Figure 2B from HEK293T cells expressing recombinant (HA or FLAG-StrepII tagged) C4orf14 were separated by SDS-PAGE and immunoblotted with antibodies to the HA and FLAG tags and antibodies recognising MRPS6, MRPS10, MRPS29, MRPL11, and MRPL15.

**Figure S2. Double-strand RNAs targeting C4orf14 repress its expression, and in one case decreases mitochondrial mRNA levels.** A; C4orf14 mRNA levels were measured via Q-PCR in RNA samples isolated from 143B osteosarcoma cells treated with or without one of two dsRNAs targeting C4orf14. Results are expressed as a proportion of the values for the control (mock-transfected cells). B; Mitochondrial mRNA levels for three transcripts, NADH dehydrogenase 1 (ND1), cytochrome *c* oxidase subunit II (COX2) and cytochrome *b*, were assayed by Q-RT-PCR from untransfected 143B cells, or cells transfected with a scrambled RNA, or dsRNAs c3 or c6 targeting C4orf14, or mock transfected. Values are expressed as a proportion of the mRNA level in the untransfected 143B cells. N = 3 independent experiments. \*\* p < 0.01, \*\*\* p < 0.001.

**Figure S3. Proteins associated with the 28S subunit are much less abundant in affinity-purified preparations of C4orf14 with a disabled GTPase, compared to the wild-type protein.** Functional (wt) and GTPase disabled (m3), recombinant forms of C4orf14 were affinity purified from HEK cells, as described in the methods. 30 µg of input protein (mitochondrial 1,000 g<sub>max</sub> supernatant - see methods) was

separated by SDS-PAGE together with eluate 3 (the latter adjusted to give an equal signal for the bait protein).

**Figure S4. C4orf14 co-sediments with the 28S subunit only if its GTPase activity is preserved.** Mitochondria lysed with n-dodecyl- $\beta$ -D-maltoside, from A) control HEK293T cells (without a transgene); B) HEK293T cells expressing GTPase active C4orf14 tagged with HA; C) HEK293T cells expressing GTPase disabled (M3) C4orf14 with flag and strepII tags, were fractionated on 10-30% sucrose gradients, and proteins from fractions 2-17 (collected manually from the base of the tube) were separated by SDS-PAGE and immunoblotted with antibodies to C4orf14, and 55S ribosome components MRPS2 and 27, and MRPL11.

**Figure S5. Conversion of supercoiled to relaxed plasmid DNA increases**

**Picogreen signal.** 250 ng lots of plasmid DNA were incubated with, 2 or 4 Units of S1 nuclease for 2 min at 37 °C. After DNA extraction, half the material was separated by 1 % agarose gel electrophoresis, while a quarter was incubated with a 1/300 dilution of Picogreen for 10 min in the dark. The DNA/Picogreen mixture was excited at 485 nm and the emissions at 535 nM quantified in a SPECTRAMax plate reader (Molecular Devices).

**Figure S6. GTPase inactive C4orf14 co-purifies with human mtDNA.** Single-step affinity purification of StrepII tagged C4orf14.m3 was carried out as described in the methods and other figures, supernatant (S), flow-through (F), washes (w) and eluted fractions (e) were loaded and separated on a 0.8 % agarose gel and *PvuII* digested mtDNA detected by Southern hybridization after transfer to solid support.

## Sucrose gradient fractionation

↑C4orf14.HA

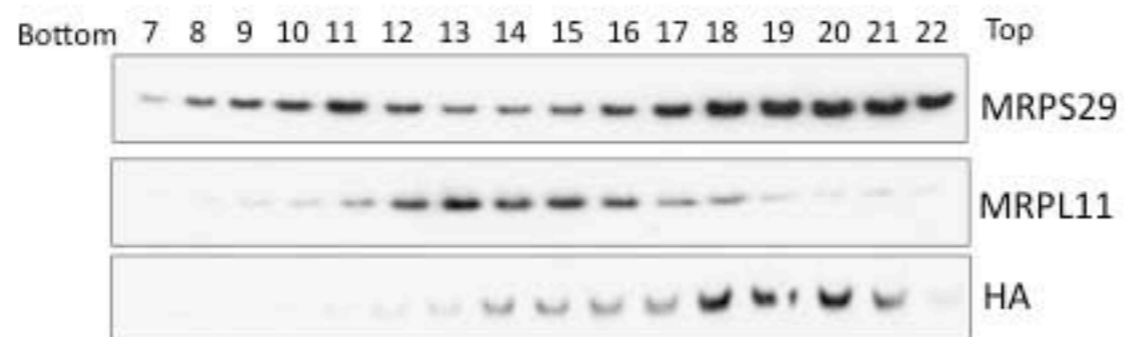

↑C4orf14.FS

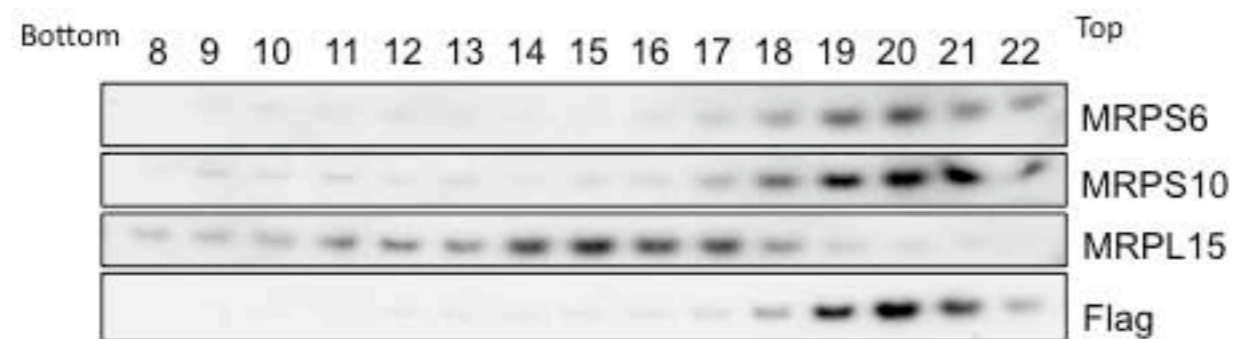

Figure S1

**A**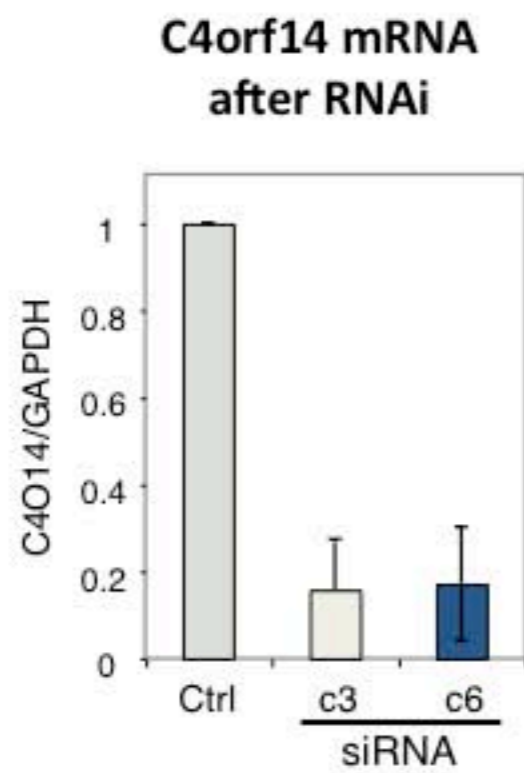**B**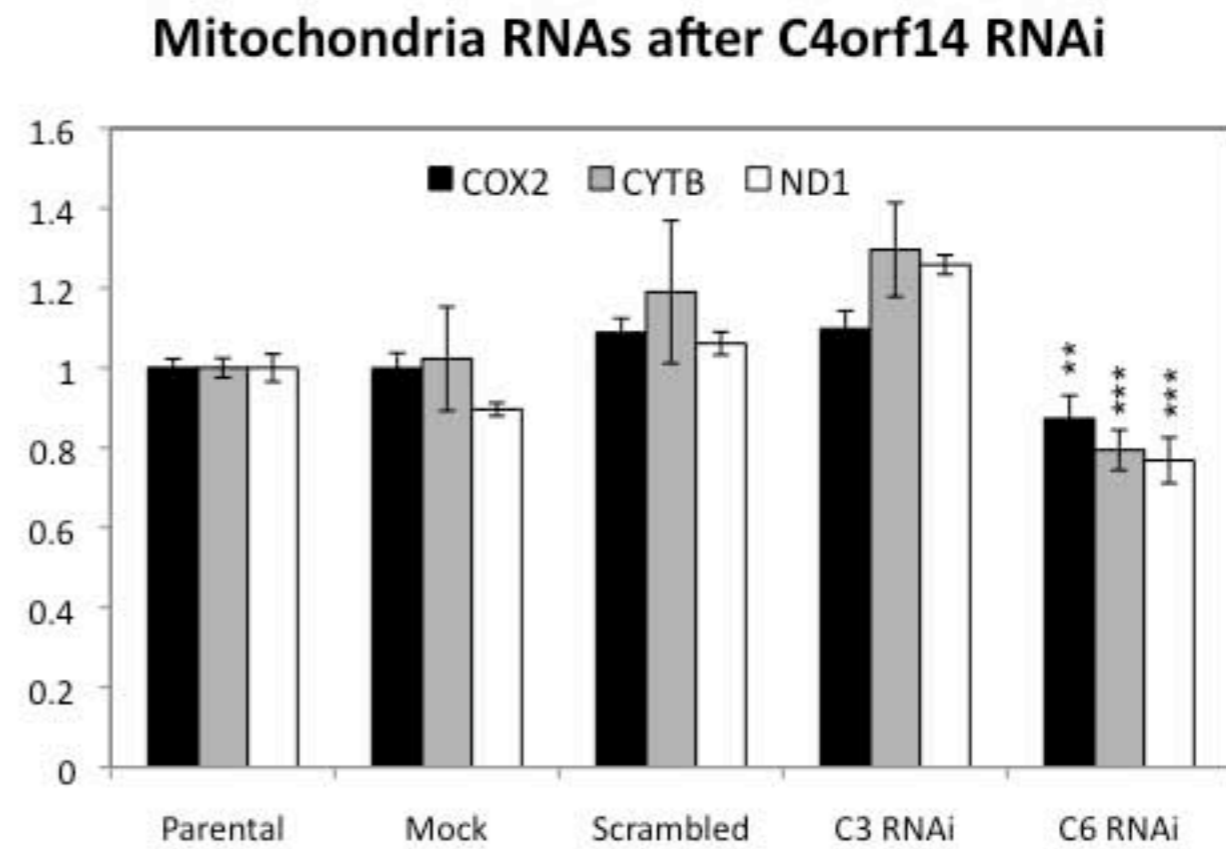

Figure S2

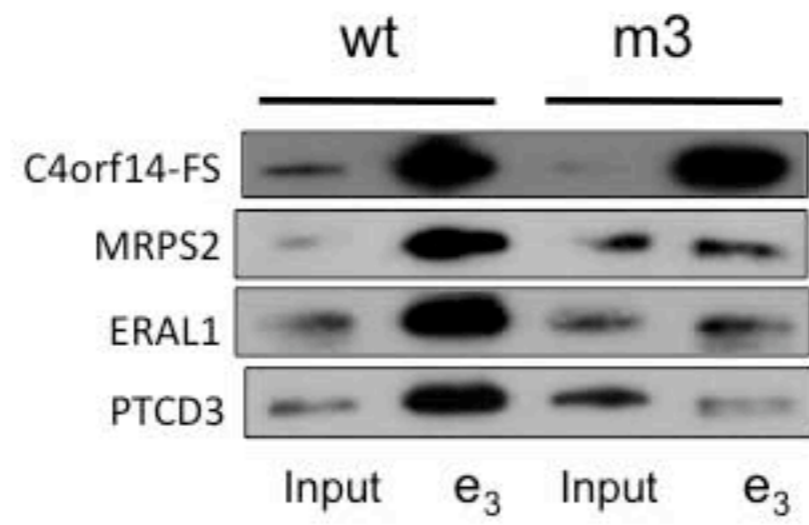

Figure S3

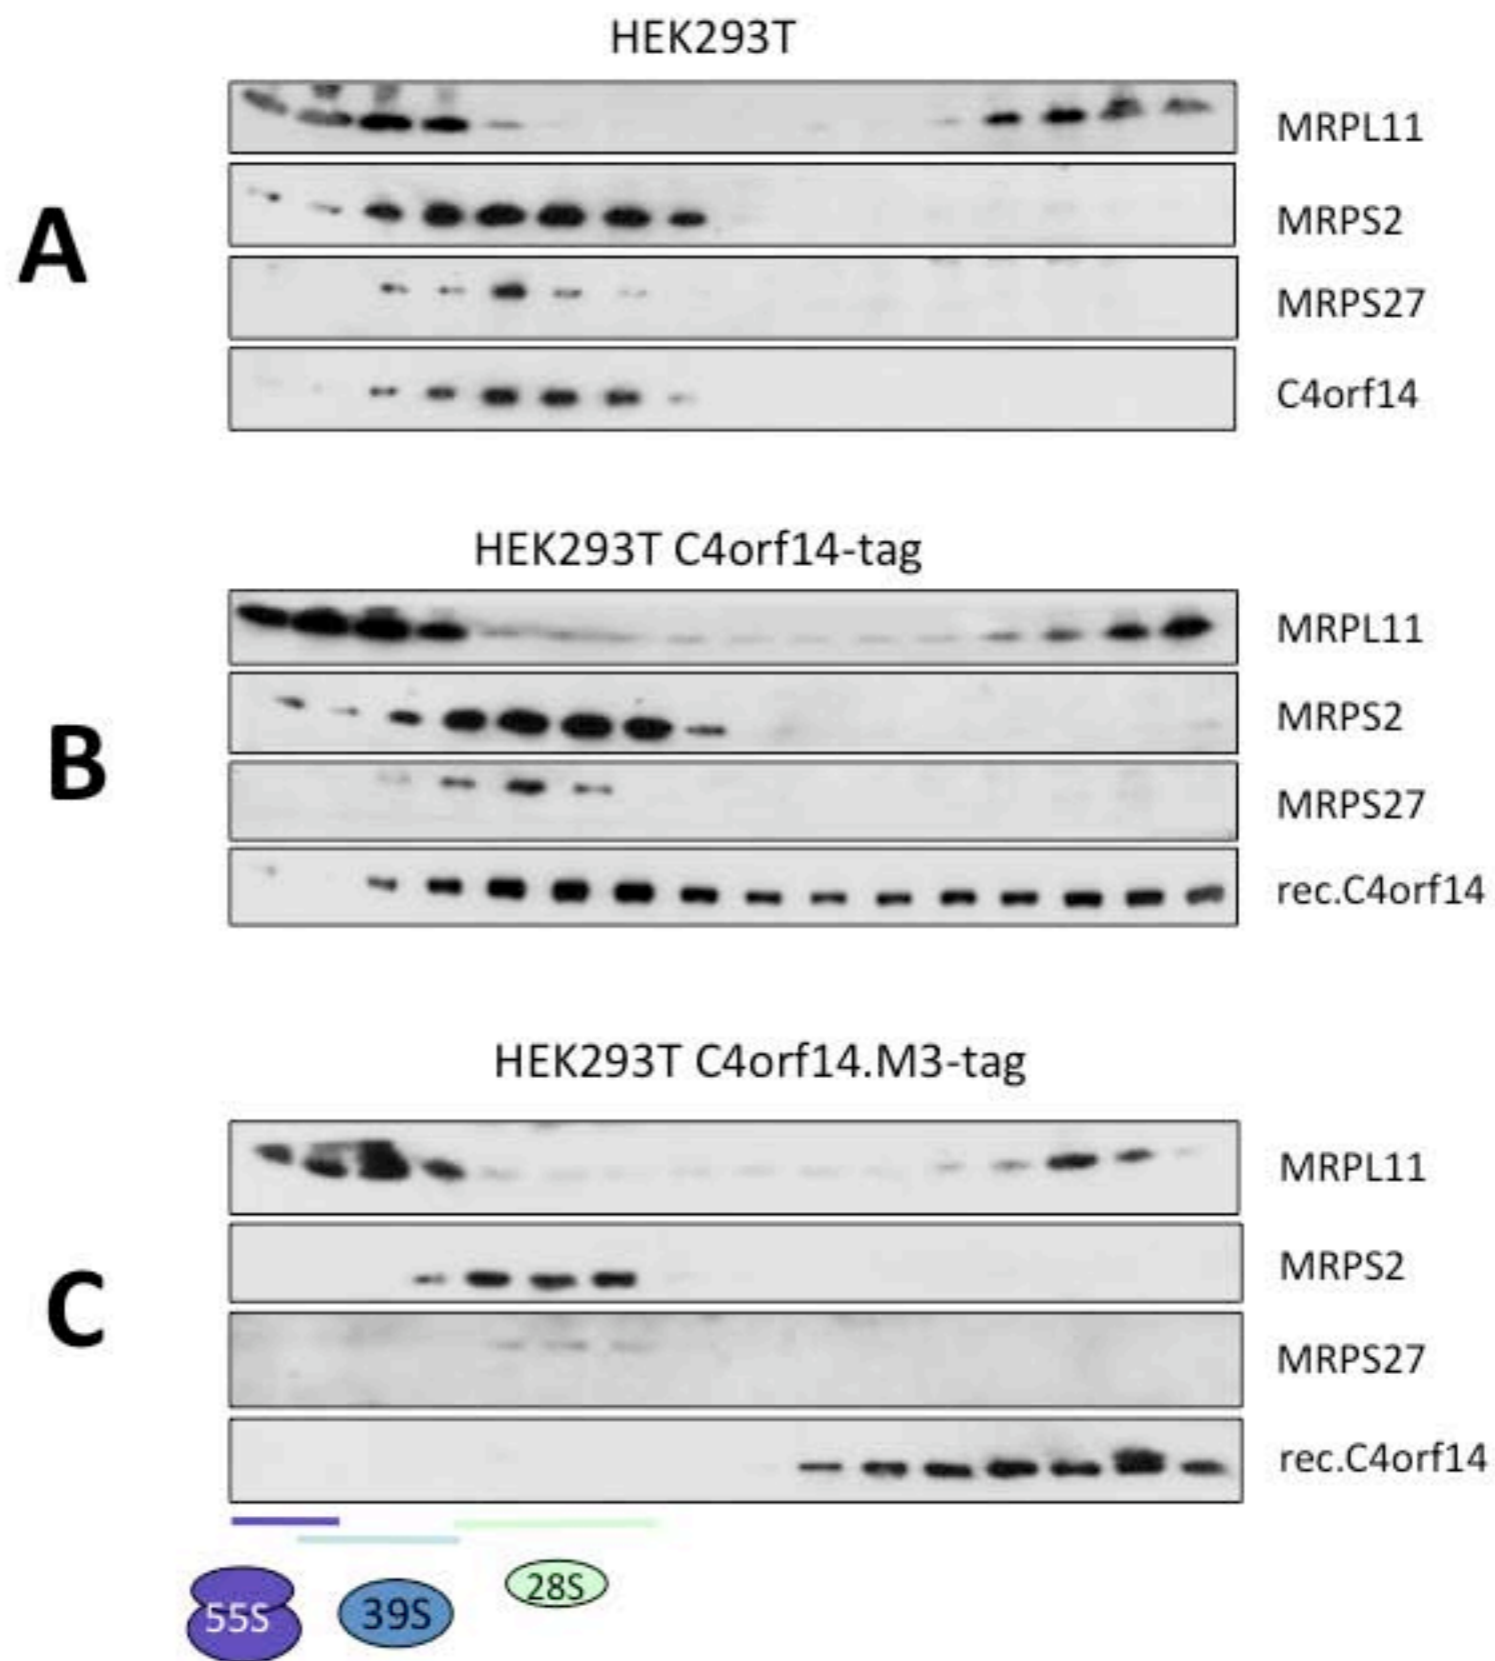

Figure S4

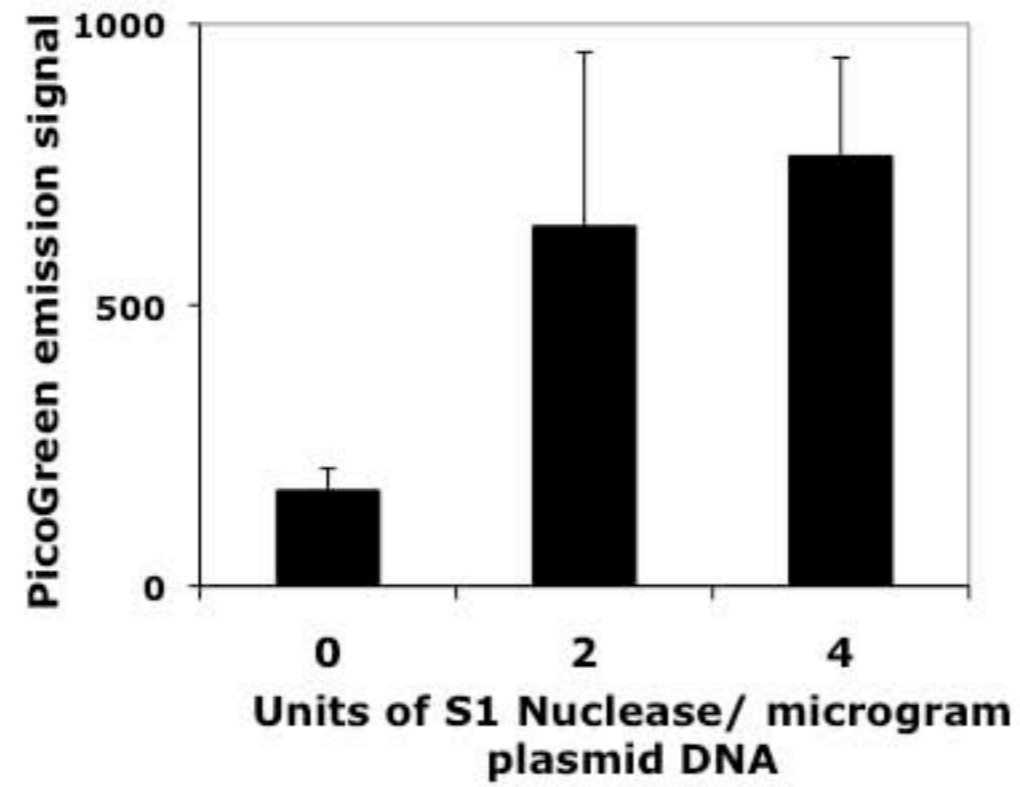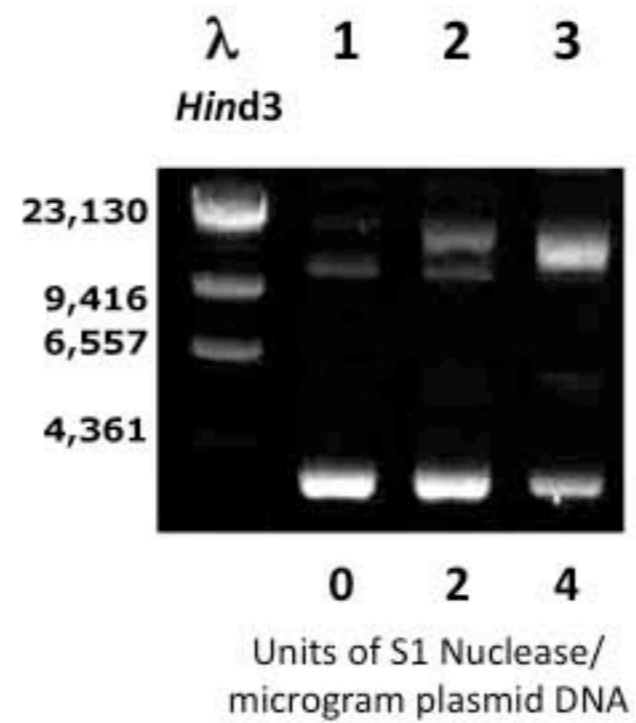

Figure S5

m3 variant of C4orf14-FS

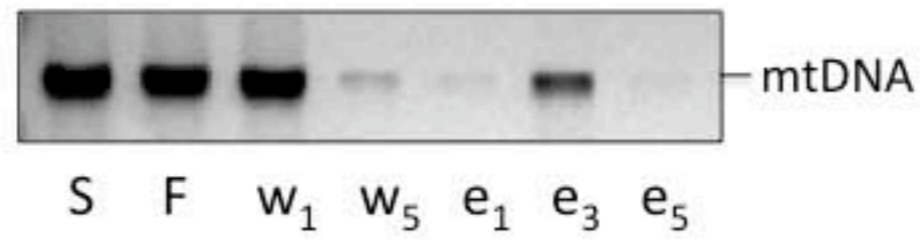

Figure S6
